# Supplementary material for: An organometallic dithiolene complex exhibiting electrochemically initiated hydrogen generation
Source: Royal Society of Chemistry journal article supplement (doi:10.1039/c3dt50193k), 2013-01-01
Supplement: c3dt50193k.pdf [file c3dt50193k.pdf]

## Organometallic dithiolene complex exhibiting an electrochemically initiated hydrogen generation

Mitsushiro Nomura,\* Chikako Fujita-Takayama, Takayoshi Yagisawa, Toru Sugiyama, Masatsugu Kajitani

*Department of Materials and Life Sciences, Faculty of Science and Technology, Sophia University, 7-1, Kioi-cho, Chiyoda-ku, Tokyo 102-8554, Japan.*

### Electronic Supplementary Information

#### Materials and instrumentation.

Organometallic cobalt dithiolene complexes studied in this work (**1-NH**, **1-NMe**, **1-NMe**, **2-NH**) were prepared by known procedure developed in our research group.<sup>1</sup> Tetraethylammonium perchlorate (TEAP) was provided from Nacalai Tesque, Inc. Ferrocene was obtained from Tokyo Chemical Industry Co., Ltd. UV-Vis spectra were measured in  $5.0 \times 10^{-5}$  MeCN solutions of complexes and were recorded on a Hitachi model UV-2500PC.

#### CV Measurements.

All electrochemical measurements were performed under an argon atmosphere. MeCN as a solvent for electrochemical measurements (HPLC grade) were given from Wako Chemicals, and further dried over molecular sieve 4A before use. A platinum wire served as a counter electrode, and the reference electrode Ag/AgNO<sub>3</sub> was corrected for junction potentials by being referenced internally to the ferrocene/ferrocenium (Fc/Fc<sup>+</sup>) couple. A stationary platinum disk (1.6 mm in diameter) was used as a working electrode. The Model CV-50W instrument from BAS Co. was used for cyclic voltammetry (CV) measurements. CVs were measured in 1 mmol·dm<sup>-3</sup> MeCN solutions of complexes containing 0.1 mol·dm<sup>-3</sup> tetraethylammonium perchlorate (TEAP) at 25 °C.

#### Spectroelectrochemical measurement.

The spectroelectrochemical data were obtained during bulk electrolysis for 1 mmol·dm<sup>-3</sup> MeCN solutions of complexes containing 0.1 mol·dm<sup>-3</sup> TEAP at 25 °C in an optically transparent thin-layer electrode (OTTLE, thin-layer thickness = 0.4 mm)<sup>2</sup> cell. Measurements were made with MCPD-7000 rapid scan spectrometer and MC-2530 of Otsuka Electronics Co., Ltd. The working electrode was stationary platinum mesh in thin-layer form. A CV measurement using a thin-layer cell was performed by using the same OTTLE cell above.

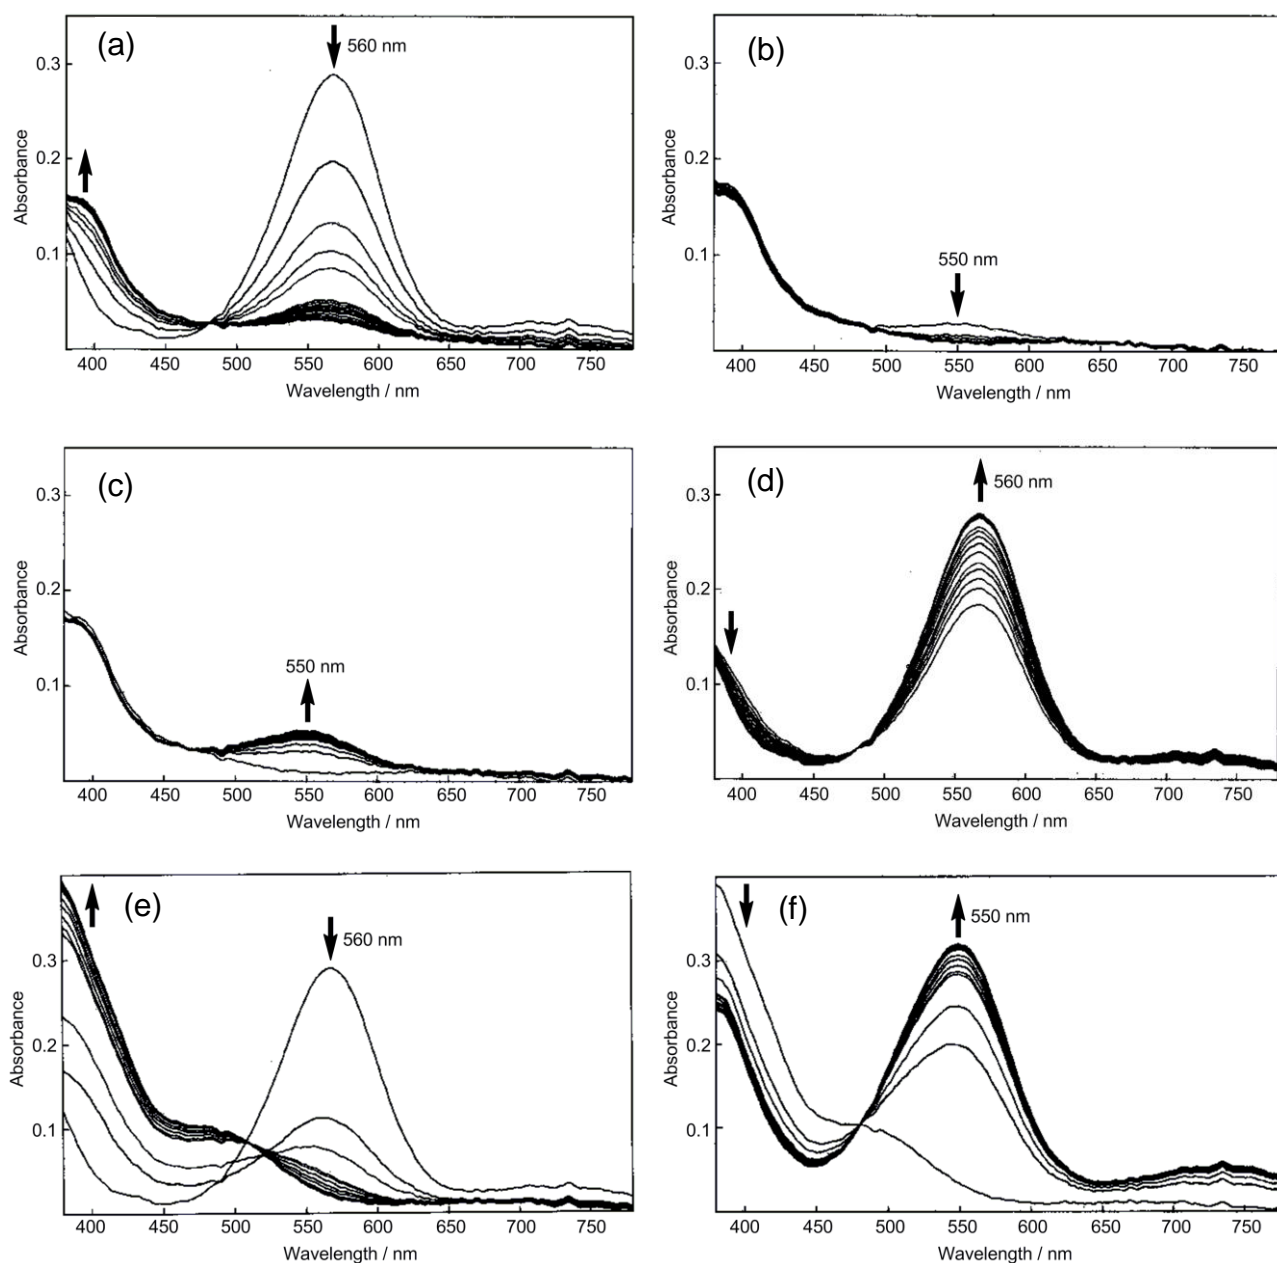

**Fig. S1.** UV-vis spectral changes of **1-NH** during (a) reduction ( $-0.2$  V to  $-1.2$  V, sampling time 30 s, sampling interval 2 s), (b) reduction ( $-1.2$  V to  $-1.6$  V), (c) reoxidation ( $-1.6$  V to  $-1.2$  V), (d) reoxidation ( $-1.2$  V to  $-0.2$  V), (e) reduction ( $-0.2$  V to  $-2.2$  V) and (f) reoxidation ( $-2.2$  V to  $-1.2$  V). Figs. S1(a), S1(b) and S1(f) are adapted from Fig. 2 in the main text.

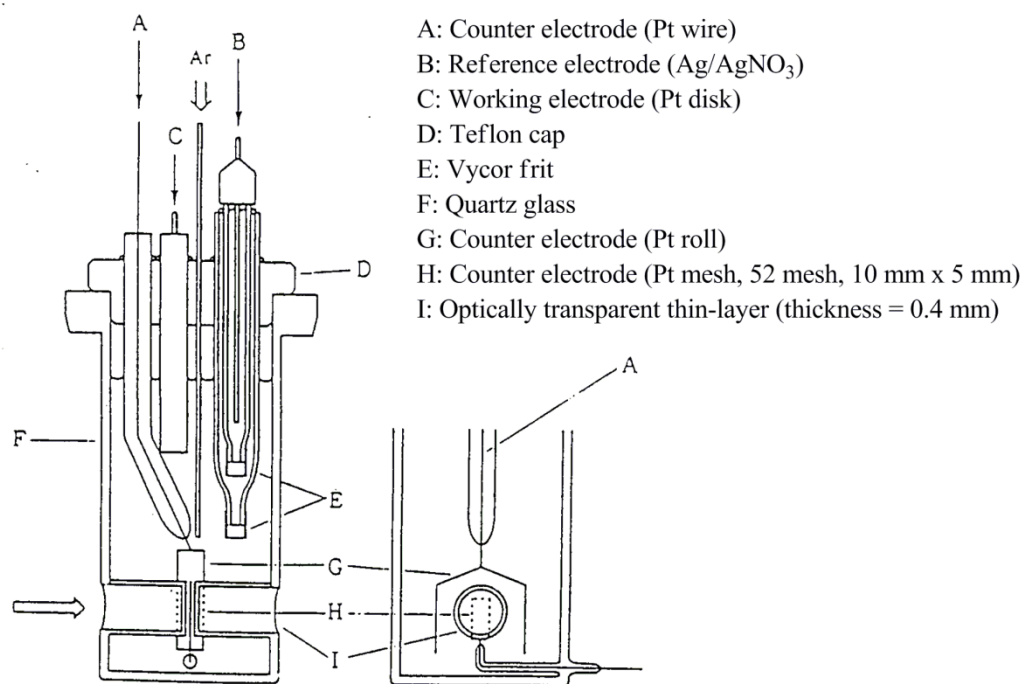

**Fig. S2.** Optically transparent thin-layer electrode (OTTLE) cell used in this work.

### Density functional theory (DFT) calculation.

Geometries of **1-NH** and **1-N<sup>-</sup>** were optimized with no constraint using the Gaussian 03 package<sup>3</sup> and the hybrid functional B3LYP.<sup>4</sup> The standard 3-21G\* basis<sup>5</sup> set was used for H, C and S together with the LanL2DZ for Co. Energy minima were confirmed by frequencies analysis.

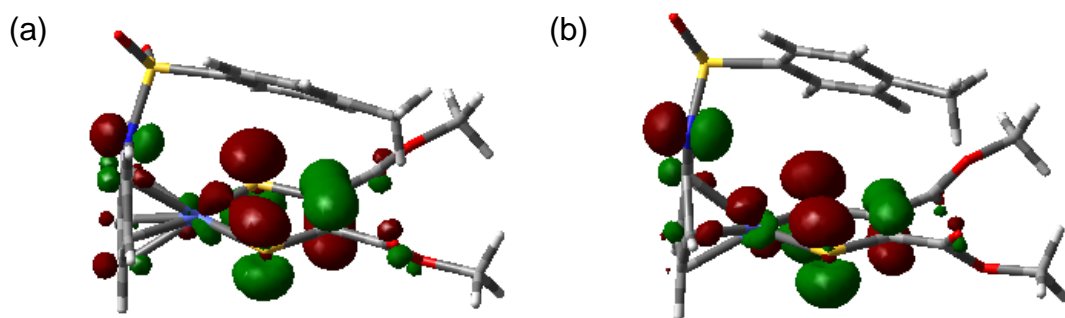

**Fig. S3.** (a) Distribution of highest occupied molecular orbital (HOMO) of **1-NH** and (b) HOMO of **1-N<sup>-</sup>** (isovalue = 0.05).

### References

- (a) M. Nomura, M. Kajitani, *J. Organomet. Chem.*, 2006, **691**, 2691. (b) M. Nomura, C. Takayama, G. C. Janairo, T. Sugiyama, Y. Yokoyama, M. Kajitani, *Organometallics*, 2003, **22**, 195.

- 
- 2 K. Shimizu, H. Ikehara, M. Kajitani, H. Ushijima, T. Akiyama, A. Sugimori, G. P. Satô, *J. Electroanal. Chem.*, 1995, **396**, 465.
- 3 M. J. Frisch, G. W. Trucks, H. B. Schlegel, G. E. Scuseria, M. A. Robb, J. R. Cheeseman, J. A. Montgomery, T. Vreven, K. N. Kudin, J. C. Burant, J. M. Millam, S. S. Iyengar, J. Tomasi, V. Barone, B. Mennucci, M. Cossi, G. Scalmani, N. Rega, G. A. Petersson, H. Nakatsuji, M. Hada, M. Ehara, K. Toyota, R. Fukuda, J. Hasegawa, H. Ishida, T. Nakajima, Y. Honda, O. Kitao, H. Nakai, M. Klene, X. Li, J. E. Knox, H. P. Hratchian, J. B. Cross, C. Adamo, J. Jaramillo, R. Gomperts, R. E. Stratmann, O. Yazyev, A. J. Austin, R. Cammi, C. Pomelli, J. Ochterski, P. Y. Ayala, K. Morokuma, G. A. Voth, P. Salvador, J. J. Dannenberg, V. G. Zakrzewski, S. Dapprich, A. D. Daniels, M. C. Strain, O. Farkas, D. K. Malick, A. D. Rabuck, K. Raghavachari, J. B. Foresman, J. V. Ortiz, Q. Cui, A. G. Baboul, S. Clifford, J. Cioslowski, B. B. Stefanov, G. Liu, A. Liashenko, P. Piskorz, I. Komaromi, R. L. Martin, D. J. Fox, T. Keith, M. A. Al-Laham, C. Y. Peng, A. Nanayakkara, M. Challacombe, P. M. W. Gill, B. Johnson, W. Chen, M. W. Wong, C. Gonzalez, J. A. Pople, *Gaussian 03*, revision B.03; Gaussian, Inc.: Pittsburgh, PA, 2003.
- 4 (a) A. D. Becke, *J. Chem. Phys.*, 1986, **84**, 4524. (b) A. D. Becke, *J. Chem. Phys.*, 1993, **98**, 5648. (c) C. T. Lee, W. T. Yang, R. G. Parr, *Phys. Rev. B*, 1988, **37**, 785.
- 5 (a) R. Krishnan, J. S. Binkley, R. Seeger, J. A. Pople, *J. Chem. Phys.*, 1980, **72**, 650. (b) J-P. Blaudeau, M. P. McGrath, L. A. Curtiss, L. Radom, *J. Chem. Phys.*, 1997, **107**, 5016. (c) L. A. Curtiss, M. P. McGrath, J-P. Blandeau, N. E. Davis, R. C., Jr. Binning, L. Radom, *J. Chem. Phys.*, 1995, **103**, 6104.
